# Supplementary material for: Mutation profiling of 19 candidate genes in acute myeloid leukemia suggests significance of DNMT3A mutations
Source: PubMed Central journal article supplement (PMC5342384; doi:10.18632/oncotarget.10240), 2016-06-23
Supplement: oncotarget-07-54825-s001.pdf [file oncotarget-07-54825-s001.pdf]

# Mutation profiling of 19 candidate genes in acute myeloid leukemia suggests significance of *DNMT3A* mutations

## SUPPLEMENTARY FIGURES AND TABLES

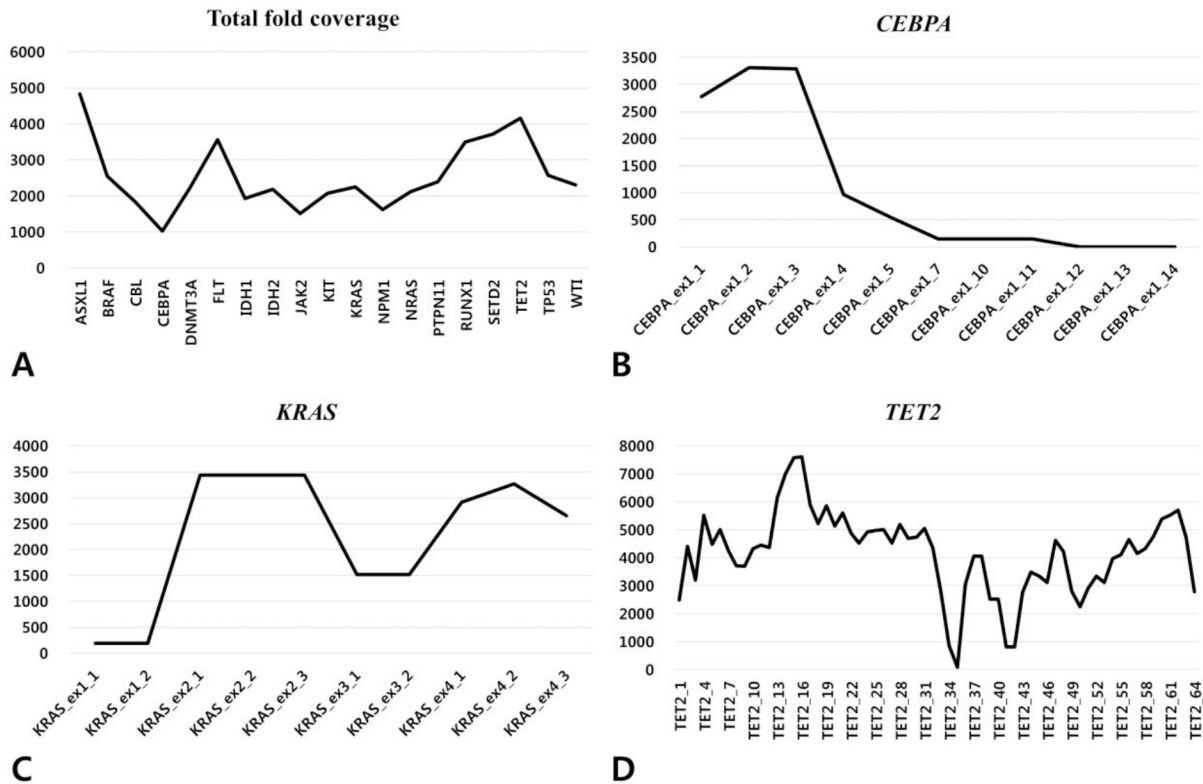

**Supplementary Figure S1: Distribution of fold coverage.** **A.** Average coverage all across genes. **B.** Coverage of individual amplicons on *CEBPA*. **C.** Coverage of individual amplicons on *KRAS*. **D.** Coverage of individual amplicons on *TET2*.

*DNMT3A*

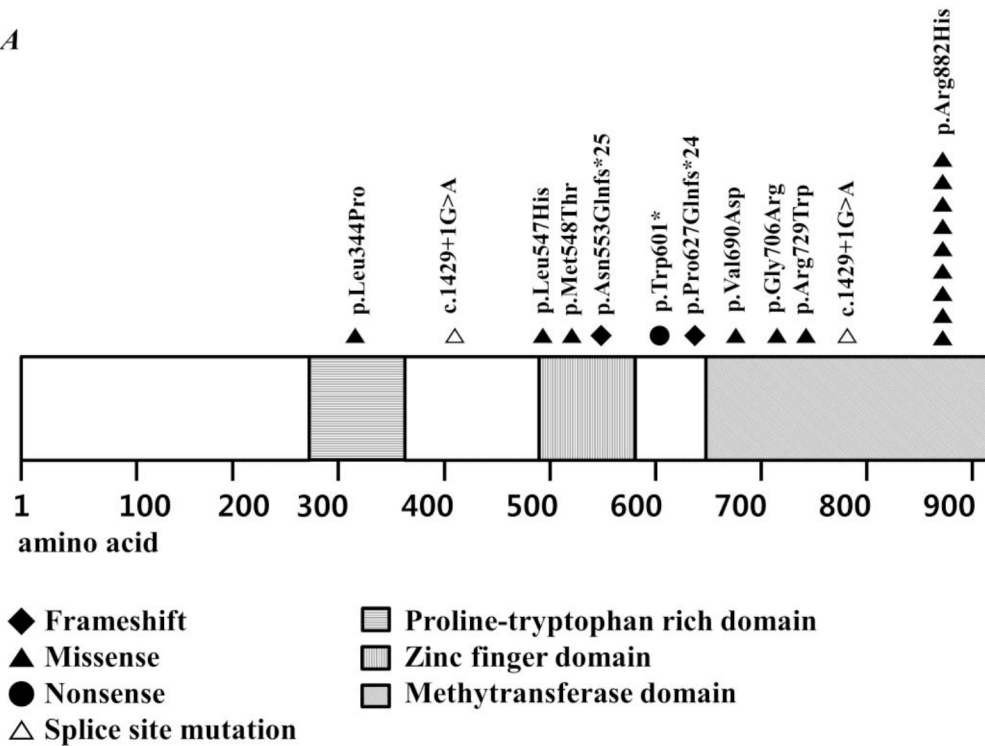

Supplementary Figure S2: Schematic representation of *DNMT3A* gene and location of mutations identified in this study.

*RUNX1*

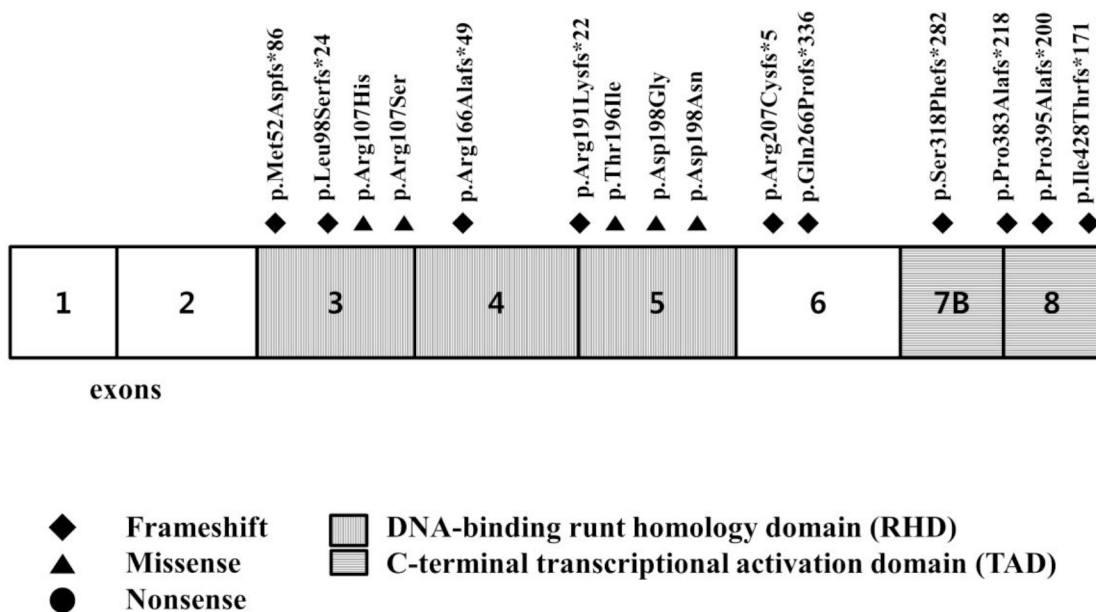

Supplementary Figure S3: Schematic representation of *RUNX1* gene and location of mutations identified in this study.

*WT1*

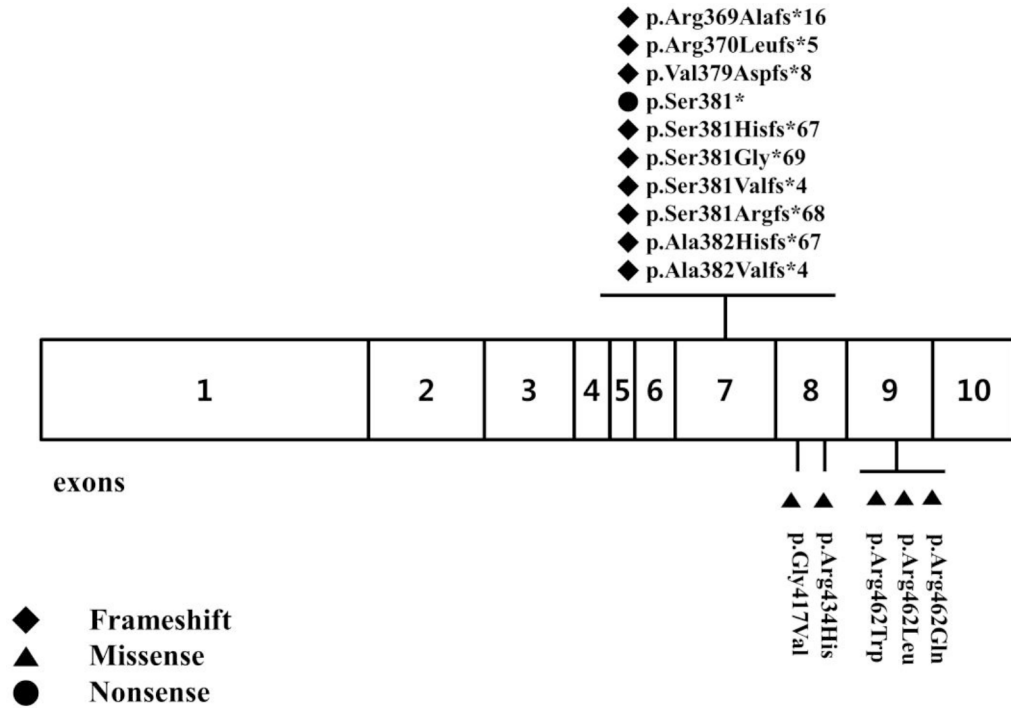

Supplementary Figure S4: Schematic representation of *WT1* gene and location of mutations identified in this study.

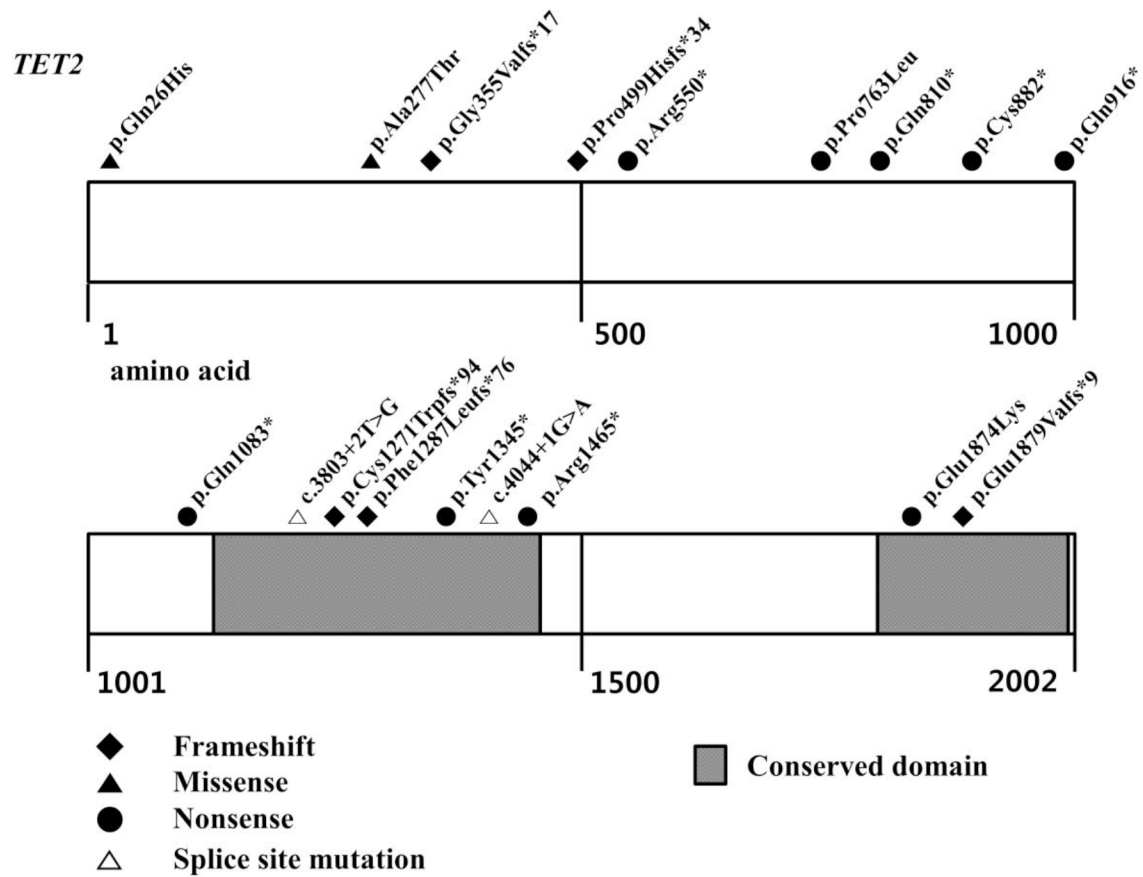

Supplementary Figure S5: Schematic representation of *TET2* gene and location of mutations identified in this study.

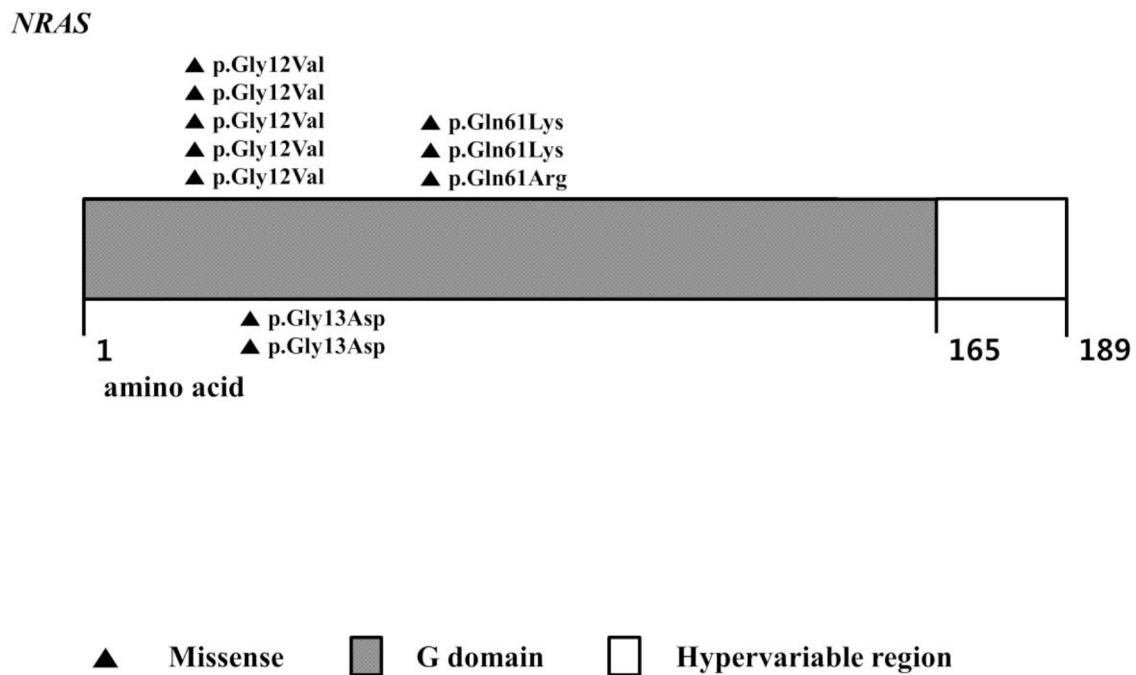

Supplementary Figure S6: Schematic representation of *NRAS* gene and location of mutations identified in this study.

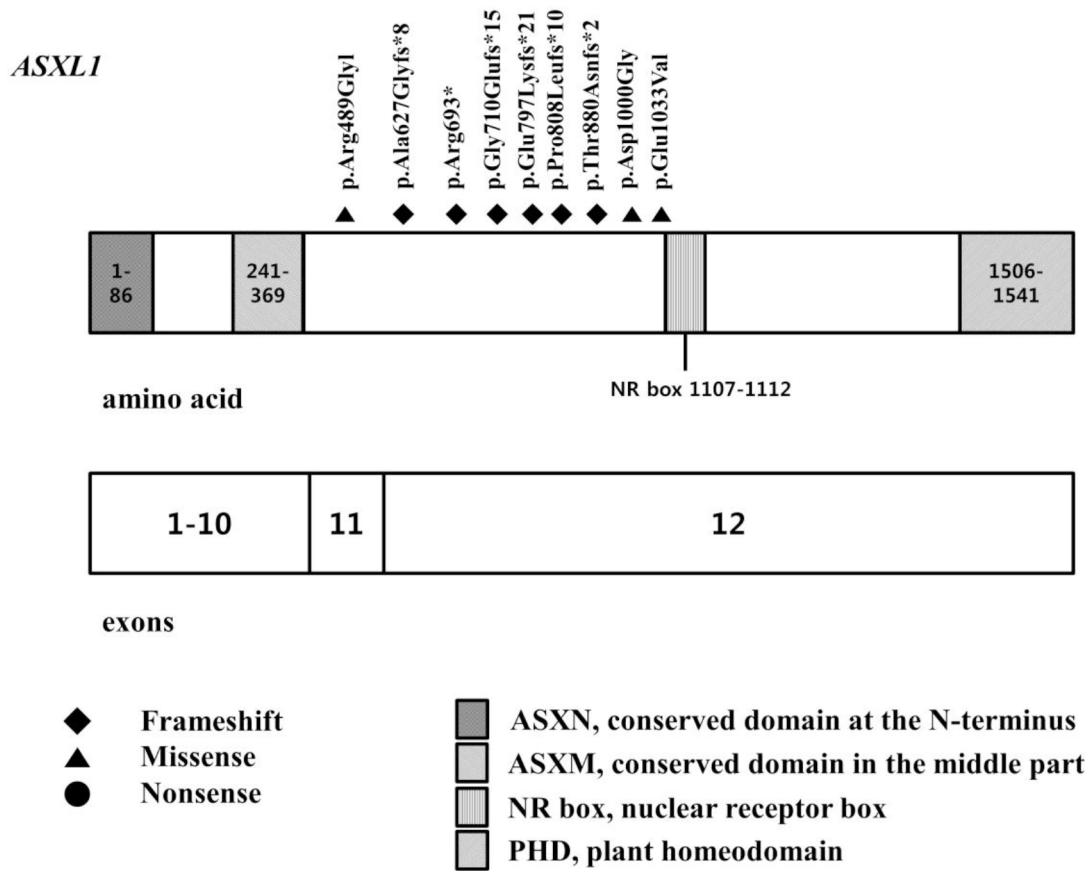

Supplementary Figure S7: Schematic representation of *ASXL1* gene and location of mutations identified in this study.

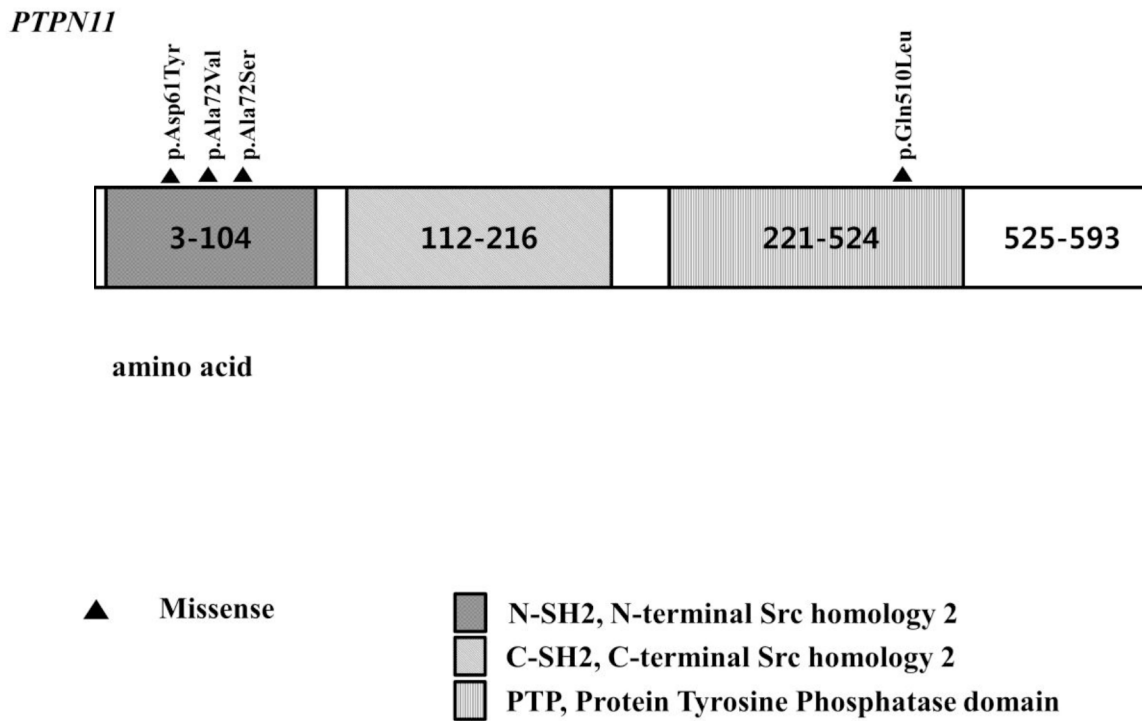

Supplementary Figure S8: Schematic representation of *PTPN11* gene and location of mutations identified in this study.

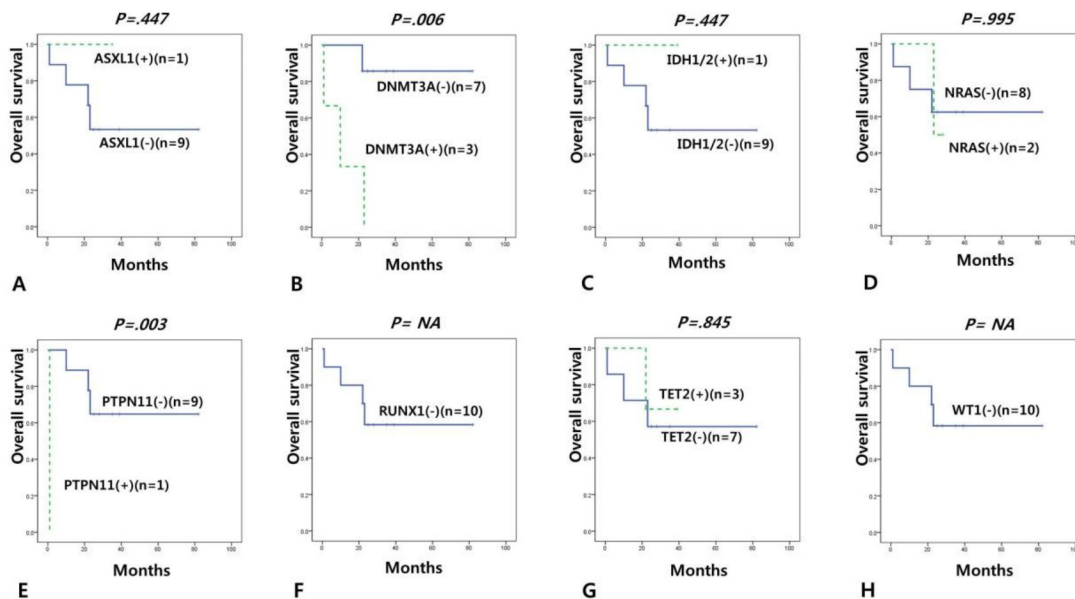

Supplementary Figure S9: Overall survival according to gene mutation in favorable group (adult *de novo* CN-AML with mutated *NPM1* without *FLT3*-ITD or CN-AML with mutated *CEBPA*) of AML defined by ELN.

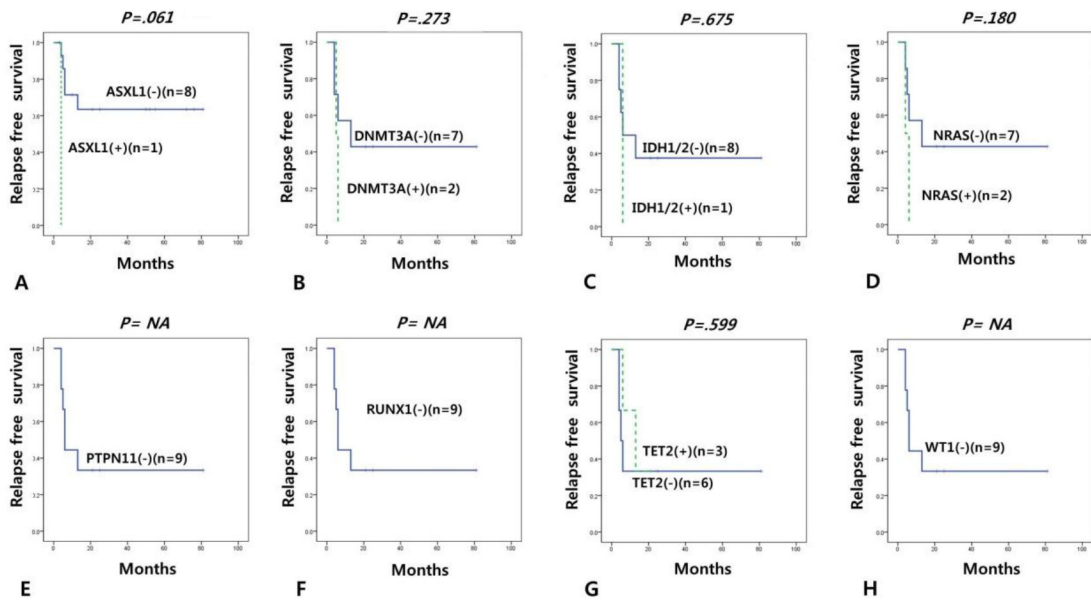

Supplementary Figure S10: Relapse free survival according to gene mutations in favorable group (adult *de novo* CN-AML with mutated *NPM1* without *FLT3-ITD* or CN-AML with mutated *CEBPA*) of AML defined by ELN.

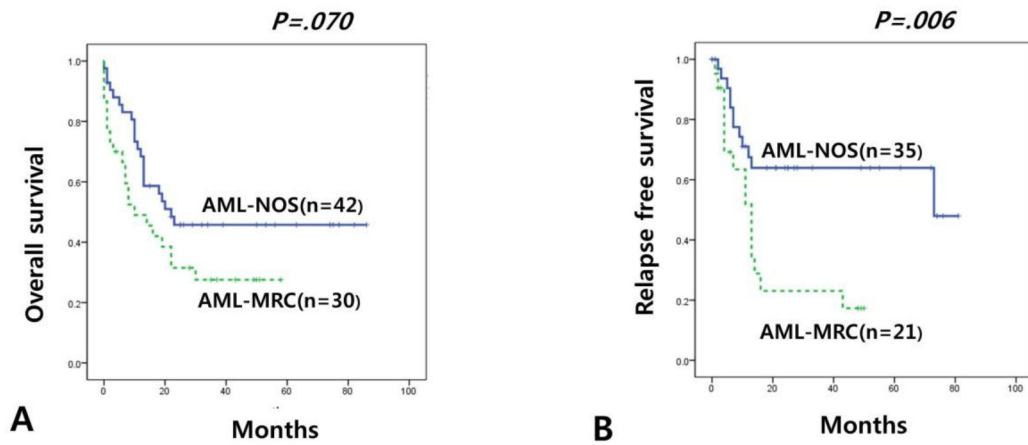

Supplementary Figure S11: Clinical outcomes of *de novo* adult AML-MRC and AML-NOS.

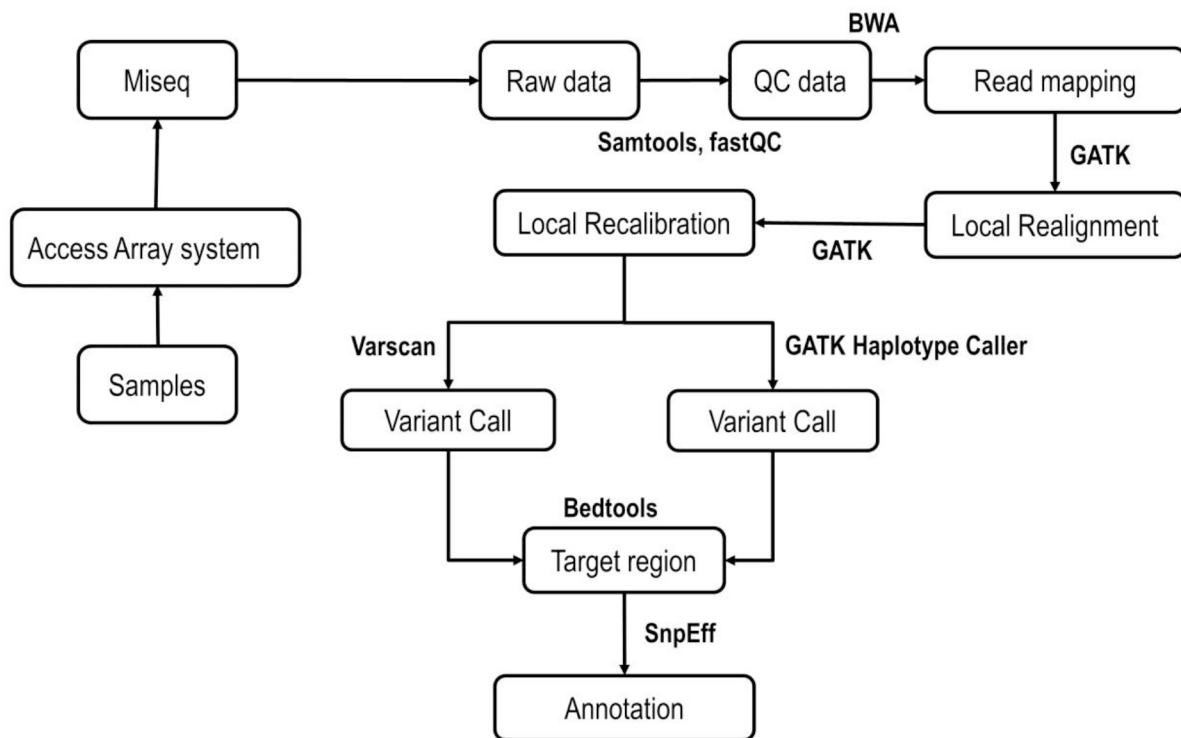

**Supplementary Figure S12: Flow chart of data analysis of targeted gene sequencing.** SAMtool and fastQC were used for quality control. The resulting raw files were aligned to the human reference genome (hg19) using the Burrows-Wheeler Aligner (BWA) algorithm with default parameters. Genome Analysis Toolkit (GATK) was used to local alignment. GATK-Haplotype caller and Varscan were used as tools for variant calling. BEDTools was used for estimating read depth and coverage. Variant annotation was performed using SnpEff.

**Supplementary Table S1: Basic characteristics of enrolled subjects.**

See Supplementary File 1



Supplementary Table S2: Number of variations filtered from NGS data and confirmed by Sanger sequencing

| Gene            | Variants identified | Confirmed by Sanger sequencing | Total variations confirmed* |
|-----------------|---------------------|--------------------------------|-----------------------------|
| <i>ASXL1</i>    | 9                   | 9/9(90%)                       | 9                           |
| <i>BRAF</i>     | 0                   | -                              | -                           |
| <i>CBL</i>      | 0                   | -                              | -                           |
| <i>CEBPA</i>    | 14                  | 10/14(71.4%)                   | 10                          |
| <i>DNMT3A</i>   | 23                  | 20/23(87.0%)                   | 20                          |
| <i>FLT3-ITD</i> | 9                   | 9/9(100%)                      | 34                          |
| <i>FLT3-TKD</i> | 6                   | 5/6(83.3%)                     | 6                           |
| <i>IDH1</i>     | 9                   | 8/9(88.9%)                     | 8                           |
| <i>IDH2</i>     | 10                  | 10/10(100%)                    | 10                          |
| <i>JAK2</i>     | 2                   | 2/2(100%)                      | 3                           |
| <i>KIT</i>      | 4                   | 2/4(50%)                       | 2                           |
| <i>KRAS</i>     | 1                   | 0/1(0%)                        | -                           |
| <i>NPM1</i>     | 23                  | 23/23(100%)                    | 24                          |
| <i>NRAS</i>     | 11                  | 10/11(90.9%)                   | 10                          |
| <i>PTPN11</i>   | 6                   | 4/6(66.7%)                     | 4                           |
| <i>RUNX1</i>    | 22                  | 15/22(68.2%)                   | 15                          |
| <i>SETD2</i>    | 8                   | 4/8(50%)                       | 4                           |
| <i>TET2</i>     | 22                  | 17/22(77.3%)                   | 17                          |
| <i>TP53</i>     | 5                   | 3/5(60.0%)                     | 3                           |
| <i>WT1</i>      | 15                  | 15/15(100%)                    | 15                          |

\* For *FLT3-ITD*, *FLT3-TKD*, *JAK2* V617F, *KIT*, *CEBPA* and *NPM1* mutations, we adopted and integrated results of clinical testing wherever available

## Supplementary Table S3: Mutations identified and confirmed by Sanger sequencing.

See Supplementary File 2

Supplementary Table S4: Relapse and complete remission rate according to gene mutations (adult *de novo* AML)

|                 | complete remission |   | <i>P</i> | relapse |    | <i>P</i> |       |
|-----------------|--------------------|---|----------|---------|----|----------|-------|
|                 | -                  | + |          | -       | +  |          |       |
| <i>FLT3-ITD</i> | -                  | 3 | 41       | .546    | 20 | 21       | .205  |
|                 | +                  | 0 | 23       |         | 15 | 8        |       |
| <i>NPM1</i>     | -                  | 3 | 47       | .565    | 26 | 21       | .866  |
|                 | +                  | 0 | 17       |         | 9  | 8        |       |
| <i>DNMT3A</i>   | -                  | 3 | 54       | 1.000   | 33 | 21       | .034  |
|                 | +                  | 0 | 10       |         | 2  | 8        |       |
| <i>RUNX1</i>    | -                  | 0 | 60       | .001    | 31 | 29       | .120  |
|                 | +                  | 3 | 4        |         | 4  | 0        |       |
| <i>WT1</i>      | -                  | 2 | 60       | .211    | 31 | 29       | .120  |
|                 | +                  | 1 | 4        |         | 4  | 0        |       |
| <i>TET2</i>     | -                  | 2 | 55       | .389    | 30 | 25       | 1.000 |
|                 | +                  | 1 | 9        |         | 5  | 4        |       |
| <i>IDH1/2</i>   | -                  | 3 | 54       | 1.000   | 30 | 24       | 1.000 |
|                 | +                  | 0 | 10       |         | 5  | 5        |       |
| <i>NRAS</i>     | -                  | 3 | 60       | 1.000   | 35 | 25       | .037  |
|                 | +                  | 0 | 4        |         | 0  | 4        |       |
| <i>ASXL1</i>    | -                  | 3 | 57       | 1.000   | 31 | 26       | 1.000 |
|                 | +                  | 0 | 7        |         | 4  | 3        |       |

Supplementary Table S5: Multivariable cox regression analysis for overall survival (adult AML)

|                   | CN-AML, <i>de novo</i> (n=66) |              |          |       | Intermediate cytogenetic risk group,<br>* <i>de novo</i> (n=68) |              |          |       |
|-------------------|-------------------------------|--------------|----------|-------|-----------------------------------------------------------------|--------------|----------|-------|
|                   | <i>P</i>                      | Hazard ratio | 95.0% CI |       | <i>P</i>                                                        | Hazard ratio | 95.0% CI |       |
|                   |                               |              | Lower    | Upper |                                                                 |              | Lower    | Upper |
| <i>Age &gt;60</i> | .428                          | 1.361        | .635     | 2.916 | .270                                                            | 1.538        | .716     | 3.304 |
| <i>Sex</i>        | .728                          | .872         | .403     | 1.887 | .943                                                            | .973         | .461     | 2.054 |
| <i>FLT3-ITD</i>   | .601                          | .824         | .400     | 1.700 | .815                                                            | .918         | .446     | 1.887 |
| <i>NPM1</i>       | .854                          | .928         | .419     | 2.054 | .875                                                            | .938         | .424     | 2.076 |
| <i>DNMT3A</i>     | .002                          | 4.042        | 1.646    | 9.923 | .003                                                            | 3.762        | 1.558    | 9.081 |
| <i>RUNX1</i>      | .077                          | 2.804        | .894     | 8.798 | .220                                                            | 2.002        | .660     | 6.074 |
| <i>WT1</i>        | .337                          | 1.789        | .545     | 5.866 | .189                                                            | 2.154        | .685     | 6.775 |
| <i>TET2</i>       | .913                          | 1.049        | .445     | 2.471 | .779                                                            | 1.130        | .480     | 2.661 |
| <i>IDH1/2</i>     | .473                          | .717         | .289     | 1.779 | .562                                                            | .766         | .312     | 1.885 |

\* Normal karyotype, t(9;11)(p22;q23) and cytogenetic abnormalities classified neither as favorable nor adverse by the ELN system

Supplementary Table S6: Multivariable cox regression analysis for relapse free survival (adult AML)

|                   | CN-AML, <i>de novo</i> (n=53) |              |          |        | Intermediate cytogenetic risk group,<br>* <i>de novo</i> (n=55) |              |          |        |
|-------------------|-------------------------------|--------------|----------|--------|-----------------------------------------------------------------|--------------|----------|--------|
|                   | <i>P</i>                      | Hazard ratio | 95.0% CI |        | <i>P</i>                                                        | Hazard ratio | 95.0% CI |        |
|                   |                               |              | Lower    | Upper  |                                                                 |              | Lower    | Upper  |
| <i>Age &gt;60</i> | .453                          | 1.393        | .586     | 3.312  | .335                                                            | 1.535        | .643     | 3.664  |
| <i>Sex</i>        | .642                          | .806         | .324     | 2.005  | .712                                                            | .843         | .340     | 2.089  |
| <i>FLT3-ITD</i>   | .650                          | .817         | .341     | 1.957  | .772                                                            | .879         | .368     | 2.102  |
| <i>NPM1</i>       | .789                          | 1.135        | .448     | 2.877  | .943                                                            | 1.035        | .406     | 2.634  |
| <i>DNMT3A</i>     | .011                          | 4.553        | 1.423    | 14.574 | .012                                                            | 4.554        | 1.400    | 14.810 |
| <i>RUNX1</i>      | .989                          | .000         | 0.000    | -      | .989                                                            | 1922559.183  | 0.000    | -      |
| <i>WT1</i>        | .983                          | .000         | 0.000    | -      | .988                                                            | .000         | 0.000    | -      |
| <i>TET2</i>       | .535                          | .678         | .198     | 2.318  | .592                                                            | .714         | .209     | 2.443  |
| <i>IDH1/2</i>     | .101                          | .367         | .111     | 1.215  | .112                                                            | .376         | .112     | 1.255  |

\* Normal karyotype, t(9;11)(p22;q23) and cytogenetic abnormalities classified neither as favorable nor adverse by the ELN system

**Supplementary Table S7: Genes and exons sequenced**

| <b>Gene</b>   | <b>Exon numbers</b> |
|---------------|---------------------|
| <i>TET2</i>   | All                 |
| <i>DNMT3A</i> | All                 |
| <i>IDH1</i>   | 4                   |
| <i>IDH2</i>   | 4                   |
| <i>NPM1</i>   | 10,11               |
| <i>FLT3</i>   | 15,20               |
| <i>CEBPA</i>  | 1                   |
| <i>ASXL1</i>  | 11,12               |
| <i>BRAF</i>   | 11,15               |
| <i>CBL</i>    | 7,8,9               |
| <i>KIT</i>    | 8,9,10,11,17        |
| <i>KRAS</i>   | 1,2,3,4             |
| <i>NRAS</i>   | 1,2,3,4             |
| <i>PTPN11</i> | 3,7,8,12,13         |
| <i>RUNX1</i>  | 3,4,5,6,7,8         |
| <i>TP53</i>   | 3,4,5,6,8,9         |
| <i>WT1</i>    | 4,5,6,7,8,9         |
| <i>SETD2</i>  | All                 |
| <i>JAK2</i>   | 12,14               |

**Supplementary Table S8: Primers used for Sanger sequencing.**

See Supplementary File 3
